# Supplementary material for: Comparison of Methodologies to Detect Low Levels of Hemolysis in Serum for Accurate Assessment of Serum microRNAs
Source: PLoS One. 2016 Apr 7;11(4):e0153200. doi: 10.1371/journal.pone.0153200 (PMC4824492; doi:10.1371/journal.pone.0153200)
Supplement: S1 File — This table shows levels of hemolysis measured by Coulter® AcT diff™ Analyzer, visual inspection, absorbance at 414 nm and the miR ratio in the hemolysis dilution series. The values represent averages of technical replicates. (XLSX) [file pone.0153200.s001.xlsx]

## Sheet: Sheet1
Method	Percentage Hemolysis in the dilution series	Value
Absorbance	0	0.1715
Absorbance	0.000976563	0.179
Absorbance	0.00390625	0.186
Absorbance	0.015625	0.2125
Absorbance	0.0625	0.2755
Absorbance	0.25	0.5375
Absorbance	1	1.5025
Absorbance	4	1.9985
Coulter AcT diff	0	2
Coulter AcT diff	0.25	2
Coulter AcT diff	1	3.33333
Coulter AcT diff	4	8
Coulter AcT diff	20	29.3333
Coulter AcT diff	100	141.333
mir.ratio	0	4.59062
mir.ratio	0.000976563	5.06978
mir.ratio	0.00390625	5.07116
mir.ratio	0.015625	5.15975
mir.ratio	0.0625	6.50617
mir.ratio	0.25	7.67197
mir.ratio	1	8.76379
mir.ratio	4	9.10982
Visual Inspection	0.001	0
Visual Inspection	0.004	0
Visual Inspection	0.016	0
Visual Inspection	0.063	0
Visual Inspection	0.25	1
Visual Inspection	1	2
Visual Inspection	4	3
Visual Inspection	20	4
Visual Inspection	100	5
